# Supplementary material for: Analysis of Novel Immunological Biomarkers Related to Rheumatoid Arthritis Disease Severity
Source: MDPI journal article supplement (doi:10.3390/ijms241512351), 2023-08-02
Supplement: s1 [file s1]

**Table S3:** Percentage of Treg cells and proliferating lymphocytes. Analysis of CD4<sup>+</sup>CD25<sup>+</sup>FoxP3<sup>+</sup> Treg cells (A) and lymphocyte proliferation (B) under unstimulated and stimulated conditions in HCs, RA, and RA+Ab. Results are expressed as mean  $\pm$  SEM. p-values were calculated using ANOVA (Fisher's LSD test) and the Kruskal-Wallis test (uncorrected Dunn's test). \* Statistical differences.

| Percentage of Treg cells and proliferating lymphocytes                               |                  |                   |                  |              |                 |                 |
|--------------------------------------------------------------------------------------|------------------|-------------------|------------------|--------------|-----------------|-----------------|
| Group                                                                                |                  |                   | <i>p</i> -values |              |                 |                 |
|                                                                                      | HC               | RA                | RA+Ab            | HC vs.<br>RA | HC vs.<br>RA+Ab | RA vs.<br>RA+Ab |
| A. Analysis of CD4 <sup>+</sup> CD25 <sup>+</sup> FoxP3 <sup>+</sup> Treg percentage |                  |                   |                  |              |                 |                 |
| n                                                                                    | 17               | 12                | 9                |              |                 |                 |
| Unstimulated Treg cells                                                              | 2.034 $\pm$ 0.3  | 0.4464 $\pm$ 0.12 | 0.387 $\pm$ 0.11 | 0.0001*      | <0.0001*        | 0.7416          |
| Stimulated Treg cells                                                                | 6.529 $\pm$ 0.82 | 7.509 $\pm$ 1.8   | 6.861 $\pm$ 0.98 | 0.9617       | 0.6812          | 0.6707          |
| B. Analysis of lymphocyte proliferation                                              |                  |                   |                  |              |                 |                 |
| n                                                                                    | 20               | 14                | 10               |              |                 |                 |
| Unstimulated lymphocytes                                                             | 8.66 $\pm$ 1     | 2.476 $\pm$ 0.34  | 2 $\pm$ 0.23     | <0.0001*     | <0.0001*        | 0.507           |
| Stimulated lymphocytes                                                               | 77.88 $\pm$ 3.31 | 37.76 $\pm$ 7.14  | 22.84 $\pm$ 5.67 | <0.0001*     | <0.0001*        | 0.0855          |
