# Supplementary material for: Analysis of Novel Immunological Biomarkers Related to Rheumatoid Arthritis Disease Severity
Source: MDPI journal article supplement (doi:10.3390/ijms241512351), 2023-08-02
Supplement: s1 [file s1]

**Table S4:** Analysis of the expression of exosomal miRNAs in serum samples. Expression of miR-21, miR-146a, and miR-155 in HCs, flare-up, and remission patients. Results are expressed as mean  $\pm$  SEM. p-values were calculated using 2-way ANOVA with the Tukey comparison test.

| Analysis of the expression of exosomal miRNAs in serum samples |                 |                 |                 |                  |                   |                        |
|----------------------------------------------------------------|-----------------|-----------------|-----------------|------------------|-------------------|------------------------|
|                                                                | Group           |                 |                 | <i>p</i> -values |                   |                        |
|                                                                | ERA             | Flare-up        | Remission       | ERA vs. flare-up | ERA vs. remission | Flare-up vs. remission |
| n                                                              | 5               | 5               | 5               |                  |                   |                        |
| miR-21                                                         | 0.79 $\pm$ 0.85 | 1.67 $\pm$ 1.18 | 1.22 $\pm$ 0.64 | 0.9988           | 0.9972            | >0.9999                |
| miR-146a                                                       | 0.04            | 0.07            | 0.22            | 0.9988           | 0.9972            | >0.9999                |
| miR-155                                                        | 0.17 $\pm$ 0.91 | 0.34 $\pm$ 0.88 | 0.71 $\pm$ 0.52 | 0.9988           | 0.9972            | >0.9999                |
