# Supplementary material for: Analysis of Novel Immunological Biomarkers Related to Rheumatoid Arthritis Disease Severity
Source: MDPI journal article supplement (doi:10.3390/ijms241512351), 2023-08-02
Supplement: s1 [file s1]

**Table S1:** Analysis of leukocyte populations. Percentage of total lymphocytes, T lymphocytes, CD3+CD4- lymphocytes, Th, NK cells, B lymphocytes, monocytes, and granulocytes and NK cells/T lymphocyte ratio in HCs, RA, ERA, flare-up, and remission patients. Results expressed as mean  $\pm$  SEM. p-values were calculated using ANOVA (Fisher's LSD test) and the Kruskal–Wallis test (uncorrected Dunn's test). \* Statistical differences.

| Analysis of leukocyte populations (%) |                 |                  |                 |                 |                 |              |               |              |               |                  |                   |               |
|---------------------------------------|-----------------|------------------|-----------------|-----------------|-----------------|--------------|---------------|--------------|---------------|------------------|-------------------|---------------|
|                                       | Group           |                  |                 |                 |                 | p-values     |               |              |               |                  |                   |               |
|                                       | HC              | RA               | ERA             | FU              | REM             | HC vs.<br>RA | HC vs.<br>ERA | HC vs.<br>FU | HC vs.<br>REM | ERA<br>vs.<br>FU | ERA<br>vs.<br>REM | FU vs.<br>REM |
| n                                     | 21              | 19               | 7               | 5               | 7               |              |               |              |               |                  |                   |               |
| Total lymphocytes                     | 34.4 $\pm$ 1.6  | 23.02 $\pm$ 2.01 | 23.36 $\pm$ 4.2 | 20.32 $\pm$ 4.5 | 24.6 $\pm$ 2.1  | <0.0001*     | 0.0038*       | 0.0014*      | 0.0093*       | 0.53             | 0.78              | 0.38          |
| T lymphocytes                         | 69.86 $\pm$ 1.8 | 70.39 $\pm$ 2.78 | 75 $\pm$ 4.2    | 76.3 $\pm$ 1.8  | 61.57 $\pm$ 4.8 | 0.81         | 0.27          | 0.13         | 0.06          | 0.64             | 0.015*            | 0.0074*       |
| CD3+CD4- lymphocytes                  | 24.48 $\pm$ 1.7 | 27.86 $\pm$ 2.67 | 27.94 $\pm$ 4.1 | 36.56 $\pm$ 5.9 | 21.56 $\pm$ 3.1 | 0.28         | 0.38          | 0.0108*      | 0.46          | 0.11             | 0.19              | 0.0074*       |
| Th lymphocytes                        | 40.27 $\pm$ 1.5 | 39.46 $\pm$ 2.32 | 42.44 $\pm$ 4.5 | 37.2 $\pm$ 4.9  | 38.09 $\pm$ 3.2 | 0.77         | 0.57          | 0.48         | 0.56          | 0.31             | 0.35              | 0.86          |
| NK cells                              | 15.7 $\pm$ 1.8  | 12.99 $\pm$ 1.96 | 11.26 $\pm$ 2.6 | 8.46 $\pm$ 2.2  | 17.96 $\pm$ 3.9 | 0.17         | 0.2           | 0.0403*      | 0.82          | 0.43             | 0.22              | 0.0562        |
| NK/T cells ratio                      | 0.27 $\pm$ 0.03 | 0.22 $\pm$ 0.05  | 0.16 $\pm$ 0.04 | 0.11 $\pm$ 0.03 | 0.35 $\pm$ 0.13 | 0.24         | 0.24          | 0.0422*      | 0.64          | 0.4              | 0.18              | 0.038*        |
| B lymphocytes                         | 7.88 $\pm$ 0.7  | 8.19 $\pm$ 0.69  | 8.243 $\pm$ 1.5 | 8.1 $\pm$ 0.9   | 8.2 $\pm$ 1.2   | 0.76         | 0.79          | 0.89         | 0.82          | 0.94             | 0.98              | 0.95          |
| Monocytes                             | 6.13 $\pm$ 0.6  | 6.31 $\pm$ 0.53  | 5.843 $\pm$ 0.7 | 6.92 $\pm$ 1.1  | 6.33 $\pm$ 1.1  | 0.81         | 0.58          | 0.65         | 0.77          | 0.42             | 0.83              | 0.54          |
| Granulocytes                          | 46.7 $\pm$ 2.1  | 55.77 $\pm$ 3.04 | 55.94 $\pm$ 5.6 | 61.72 $\pm$ 6.7 | 51.36 $\pm$ 3.9 | 0.017*       | 0.072         | 0.0121*      | 0.36          | 0.39             | 0.46              | 0.13          |
