# Supplementary material for: Analysis of Novel Immunological Biomarkers Related to Rheumatoid Arthritis Disease Severity
Source: MDPI journal article supplement (doi:10.3390/ijms241512351), 2023-08-02
Supplement: s1 [file s1]

**Table S2:** Expression of leukocyte antigens. Percentage of expression of EGFR, EPCR, CD16, CD32, CD64, CD45RA, CD45RO, CD62L, and CD11a in lymphocyte subpopulations, monocytes, and granulocytes from HCs, ERA, flare-up, and remission patients. Results expressed as mean  $\pm$  SEM.

|                                                                   | Expression of leukocyte antigens (%) |                  |                   |                   |                   |
|-------------------------------------------------------------------|--------------------------------------|------------------|-------------------|-------------------|-------------------|
|                                                                   | Group                                |                  |                   |                   |                   |
|                                                                   | HC                                   | RA               | ERA               | Flare-up          | Remission         |
| n                                                                 | 21                                   | 19               | 7                 | 5                 | 7                 |
| EGFR <sup>+</sup> total lymphocytes                               | 31.20 $\pm$ 5.33                     | 6.44 $\pm$ 1.91  | 2.38 $\pm$ 0.58   | 10.98 $\pm$ 6.34  | 7.27 $\pm$ 2.18   |
| EPCR <sup>+</sup> total lymphocytes                               | 23.07 $\pm$ 5.715                    | 18.44 $\pm$ 5.36 | 4.99 $\pm$ 1.54   | 35.62 $\pm$ 14.98 | 19.63 $\pm$ 7.67  |
| CD16 <sup>+</sup> total lymphocytes                               | 40.26 $\pm$ 4.97                     | 44.43 $\pm$ 4.93 | 29.56 $\pm$ 4.86  | 66.96 $\pm$ 11.47 | 43.2 $\pm$ 3.77   |
| CD32 <sup>+</sup> total lymphocytes                               | 17.9 $\pm$ 2.15                      | 35.27 $\pm$ 4.11 | 23.21 $\pm$ 8.48  | 44.96 $\pm$ 6.44  | 40.4 $\pm$ 2.45   |
| CD64 <sup>+</sup> total lymphocytes                               | 10.27 $\pm$ 1.62                     | 9.24 $\pm$ 2.45  | 5.97 $\pm$ 2.94   | 11.7 $\pm$ 4.73   | 10.76 $\pm$ 5.18  |
| CD45RA <sup>+</sup> total lymphocytes                             | 76.88 $\pm$ 1.74                     | 45.77 $\pm$ 5.16 | 29.9 $\pm$ 2.83   | 74.22 $\pm$ 9.77  | 41.33 $\pm$ 4.63  |
| CD45RO <sup>+</sup> total lymphocytes                             | 42.42 $\pm$ 2.24                     | 68.07 $\pm$ 4.43 | 74.7 $\pm$ 3.96   | 48.02 $\pm$ 12.04 | 75.77 $\pm$ 3.19  |
| CD62L <sup>+</sup> total lymphocytes                              | 76.96 $\pm$ 2.82                     | 58.16 $\pm$ 3.94 | 63.14 $\pm$ 6.32  | 43.32 $\pm$ 7.72  | 63.77 $\pm$ 4.74  |
| CD11a <sup>+</sup> total lymphocytes                              | 84.06 $\pm$ 2.65                     | 46.89 $\pm$ 5.79 | 33.77 $\pm$ 8.41  | 69.06 $\pm$ 9.73  | 44.19 $\pm$ 8.31  |
| EGFR <sup>+</sup> T lymphocytes                                   | 39.6 $\pm$ 6.72                      | 5.73 $\pm$ 1.94  | 2.24 $\pm$ 0.60   | 10.68 $\pm$ 6.52  | 5.69 $\pm$ 2.26   |
| EPCR <sup>+</sup> T lymphocytes                                   | 30.70 $\pm$ 8.66                     | 19.26 $\pm$ 6.1  | 3.93 $\pm$ 1.42   | 39.66 $\pm$ 16.42 | 20.01 $\pm$ 8.97  |
| CD16 <sup>+</sup> T lymphocytes                                   | 31.43 $\pm$ 7.39                     | 36.47 $\pm$ 6.07 | 21.8 $\pm$ 3.415  | 66.64 $\pm$ 13.93 | 29.59 $\pm$ 6.64  |
| CD32 <sup>+</sup> T lymphocytes                                   | 3.84 $\pm$ 1.06                      | 32.58 $\pm$ 4.74 | 10.89 $\pm$ 3.28  | 44.4 $\pm$ 8.47   | 45.84 $\pm$ 3.54  |
| CD64 <sup>+</sup> T lymphocytes                                   | 13.47 $\pm$ 2.29                     | 6.45 $\pm$ 2.11  | 2.5 $\pm$ 0.65    | 8.48 $\pm$ 4.24   | 8.94 $\pm$ 4.81   |
| CD45RA <sup>+</sup> T lymphocytes                                 | 76.7 $\pm$ 1.98                      | 54.79 $\pm$ 4.81 | 39.39 $\pm$ 3.58  | 80.2 $\pm$ 9.1    | 52.06 $\pm$ 4.29  |
| CD45RO <sup>+</sup> T lymphocytes                                 | 54.89 $\pm$ 2.92                     | 70.63 $\pm$ 4.09 | 76.4 $\pm$ 2.99   | 53.18 $\pm$ 11.83 | 77.33 $\pm$ 3.35  |
| CD62L <sup>+</sup> T lymphocytes                                  | 82.96 $\pm$ 3.26                     | 62.84 $\pm$ 4.26 | 66.4 $\pm$ 6.8    | 44.06 $\pm$ 7.54  | 72.69 $\pm$ 3.81  |
| CD11a <sup>+</sup> T lymphocytes                                  | 98.81 $\pm$ 0.69                     | 49.55 $\pm$ 6.59 | 35.8 $\pm$ 9.711  | 75.7 $\pm$ 10.62  | 44.61 $\pm$ 9.42  |
| EGFR <sup>+</sup> Th lymphocytes                                  | 41.07 $\pm$ 6.97                     | 5.62 $\pm$ 1.9   | 2.19 $\pm$ 0.6    | 10.46 $\pm$ 6.22  | 5.6 $\pm$ 2.43    |
| EPCR <sup>+</sup> Th lymphocytes                                  | 30.82 $\pm$ 8.75                     | 19.59 $\pm$ 6.07 | 4.03 $\pm$ 1.470  | 39.44 $\pm$ 16.47 | 20.97 $\pm$ 8.99  |
| CD45RA <sup>+</sup> Th lymphocytes                                | 65.92 $\pm$ 2.88                     | 60.85 $\pm$ 4.25 | 51.13 $\pm$ 5.86  | 74.6 $\pm$ 10.53  | 60.76 $\pm$ 4.67  |
| CD45RO <sup>+</sup> Th lymphocytes                                | 63.96 $\pm$ 3.44                     | 67.26 $\pm$ 3.4  | 65.6 $\pm$ 5.15   | 64.26 $\pm$ 10.13 | 71.07 $\pm$ 3.84  |
| CD62L <sup>+</sup> Th lymphocytes                                 | 85.8 $\pm$ 3.17                      | 69.04 $\pm$ 5.5  | 80.06 $\pm$ 4.22  | 37.32 $\pm$ 11.26 | 80.67 $\pm$ 2.28  |
| CD11a <sup>+</sup> Th lymphocytes                                 | 98.68 $\pm$ 0.81                     | 41.01 $\pm$ 7.52 | 23.16 $\pm$ 7.37  | 74.2 $\pm$ 14.16  | 35.14 $\pm$ 10.98 |
| EGFR <sup>+</sup> CD3 <sup>+</sup> CD4 <sup>+</sup> lymphocytes   | 37.68 $\pm$ 6.48                     | 5.59 $\pm$ 2     | 2.19 $\pm$ 0.61   | 10.68 $\pm$ 6.97  | 5.36 $\pm$ 2.05   |
| EPCR <sup>+</sup> CD3 <sup>+</sup> CD4 <sup>+</sup> lymphocytes   | 29.54 $\pm$ 8.58                     | 17.42 $\pm$ 6.09 | 3.61 $\pm$ 1.3    | 36.42 $\pm$ 17.5  | 17.66 $\pm$ 8.95  |
| CD45RA <sup>+</sup> CD3 <sup>+</sup> CD4 <sup>+</sup> lymphocytes | 90.6 $\pm$ 1.18                      | 45.91 $\pm$ 6.55 | 27.24 $\pm$ 4.72  | 84.1 $\pm$ 10.79  | 37.29 $\pm$ 5.27  |
| CD45RO <sup>+</sup> CD3 <sup>+</sup> CD4 <sup>+</sup> lymphocytes | 43.94 $\pm$ 3.47                     | 76.87 $\pm$ 6.25 | 88.11 $\pm$ 4.86  | 43.92 $\pm$ 15.08 | 89.17 $\pm$ 3.18  |
| CD62L <sup>+</sup> CD3 <sup>+</sup> CD4 <sup>+</sup> lymphocytes  | 78.32 $\pm$ 4.18                     | 53.13 $\pm$ 4.21 | 47.07 $\pm$ 8.13  | 54.58 $\pm$ 5.77  | 58.14 $\pm$ 7.22  |
| CD11a <sup>+</sup> CD3 <sup>+</sup> CD4 <sup>+</sup> lymphocytes  | 99.33 $\pm$ 0.38                     | 60.73 $\pm$ 6.67 | 55.16 $\pm$ 13.93 | 69.18 $\pm$ 14.19 | 60.26 $\pm$ 7.68  |
| EGFR <sup>+</sup> NK cells                                        | 22.34 $\pm$ 5.14                     | 7.43 $\pm$ 1.99  | 3.27 $\pm$ 1.11   | 13.54 $\pm$ 6.37  | 7.23 $\pm$ 2.05   |
| EPCR <sup>+</sup> NK cells                                        | 10.33 $\pm$ 1.66                     | 6.58 $\pm$ 2.89  | 2.64 $\pm$ 1.07   | 7.6 $\pm$ 5.21    | 9.79 $\pm$ 7.05   |
| CD16 <sup>+</sup> NK cells                                        | 72.65 $\pm$ 2.97                     | 64.86 $\pm$ 4.49 | 59.36 $\pm$ 9.63  | 70.40 $\pm$ 5.98  | 66.41 $\pm$ 6.74  |
| CD32 <sup>+</sup> NK cells                                        | 53.66 $\pm$ 4.93                     | 36.89 $\pm$ 4.92 | 34.19 $\pm$ 10.17 | 52.30 $\pm$ 8.761 | 28.6 $\pm$ 4.02   |
| CD64 <sup>+</sup> NK cells                                        | 6.54 $\pm$ 1.4                       | 15.46 $\pm$ 3.55 | 9.77 $\pm$ 3.58   | 22.66 $\pm$ 7.33  | 16.01 $\pm$ 7.25  |
| CD45RA <sup>+</sup> NK cells                                      | 98.87 $\pm$ 0.36                     | 27.21 $\pm$ 7.83 | 7.99 $\pm$ 3.48   | 62.74 $\pm$ 20.5  | 21.06 $\pm$ 8.29  |
| CD45RO <sup>+</sup> NK cells                                      | 9.36 $\pm$ 2.58                      | 81.51 $\pm$ 7.64 | 97.83 $\pm$ 1.42  | 36.68 $\pm$ 17.52 | 97.21 $\pm$ 1.49  |
| CD62L <sup>+</sup> NK cells                                       | 74.42 $\pm$ 3.97                     | 39.65 $\pm$ 5.07 | 38.01 $\pm$ 6.8   | 56.7 $\pm$ 13.83  | 29.11 $\pm$ 4.32  |
| CD11a <sup>+</sup> NK cells                                       | 95.67 $\pm$ 3.79                     | 66.98 $\pm$ 6.55 | 64.04 $\pm$ 14.59 | 51.2 $\pm$ 8.8    | 81.19 $\pm$ 5.93  |
| EGFR <sup>+</sup> B lymphocytes                                   | 1.37 $\pm$ 0.34                      | 9.14 $\pm$ 2.65  | 2.443 $\pm$ 0.789 | 17.10 $\pm$ 6.67  | 10.14 $\pm$ 4.48  |
| EPCR <sup>+</sup> B lymphocytes                                   | 3.24 $\pm$ 0.73                      | 25.23 $\pm$ 7.35 | 20.5 $\pm$ 7.36   | 36.3 $\pm$ 19.77  | 22.06 $\pm$ 13.41 |
| CD45RA <sup>+</sup> B lymphocytes                                 | 99.75 $\pm$ 0.095                    | 28.04 $\pm$ 8.9  | 4.9 $\pm$ 2.16    | 81.24 $\pm$ 18.49 | 13.19 $\pm$ 3.83  |
| CD45RO <sup>+</sup> B lymphocytes                                 | 3.88 $\pm$ 2.12                      | 81.36 $\pm$ 7.92 | 98.34 $\pm$ 1.38  | 34.92 $\pm$ 18.08 | 97.56 $\pm$ 2.13  |
| CD62L <sup>+</sup> B lymphocytes                                  | 92.57 $\pm$ 1.1                      | 71.83 $\pm$ 8.06 | 84.49 $\pm$ 6.87  | 26.7 $\pm$ 17.36  | 91.41 $\pm$ 2.2   |
| CD11a <sup>+</sup> B lymphocytes                                  | 2.71 $\pm$ 0.74                      | 23.81 $\pm$ 8.72 | 1.87 $\pm$ 0.8    | 75.66 $\pm$ 18.48 | 8.7 $\pm$ 4.11    |
| EGFR <sup>+</sup> monocytes                                       | 53.78 $\pm$ 7.77                     | 22.72 $\pm$ 6.6  | 21.04 $\pm$ 13.24 | 27.18 $\pm$ 14.37 | 21.2 $\pm$ 8.81   |
| EPCR <sup>+</sup> monocytes                                       | 32.95 $\pm$ 5.31                     | 17.95 $\pm$ 5.41 | 21.67 $\pm$ 12.86 | 14.10 $\pm$ 5.23  | 16.97 $\pm$ 7.45  |
| CD16 <sup>+</sup> monocytes                                       | 76.26 $\pm$ 4.44                     | 54.62 $\pm$ 4.18 | 65.14 $\pm$ 5.26  | 57.46 $\pm$ 3.99  | 42.07 $\pm$ 7.81  |
| CD32 <sup>+</sup> monocytes                                       | 42.98 $\pm$ 5.72                     | 88.29 $\pm$ 4.07 | 77.74 $\pm$ 9.78  | 95.16 $\pm$ 3.35  | 93.94 $\pm$ 2.06  |

|                                  |            |            |             |             |             |
|----------------------------------|------------|------------|-------------|-------------|-------------|
| CD64 <sup>+</sup> monocytes      | 83.93±2.42 | 73.02±4.99 | 67.83±9.44  | 87.68±4.39  | 67.73±8.34  |
| CD45RA <sup>+</sup> monocytes    | 52.7±4     | 42.11±6.44 | 39.59±11.87 | 45.56±10.86 | 42.16±11.75 |
| CD45RO <sup>+</sup> monocytes    | 56.88±4.78 | 47.11±4.8  | 43.24±6.36  | 43.78±15.61 | 53.34±4.54  |
| CD62L <sup>+</sup> monocytes     | 97.07±0.51 | 81.25±4.28 | 89.09±2.21  | 69.06±15.1  | 82.13±2.74  |
| CD11a <sup>+</sup> monocytes     | 97.62±0.47 | 61.51±6.43 | 52.56±11.66 | 74.64±6.39  | 61.09±12.13 |
| EGFR <sup>+</sup> granulocytes   | 93.63±3.33 | 28.56±7.41 | 25.09±13.24 | 32.48±15.69 | 29.23±12.28 |
| EPCR <sup>+</sup> granulocytes   | 47.33±7.14 | 17.17±6.08 | 19.29±13.17 | 13.5±5.97   | 17.7±10.42  |
| CD16 <sup>+</sup> granulocytes   | 99.03±0.34 | 96.72±1.15 | 98.31±0.36  | 97.28±0.77  | 94.73±3.04  |
| CD32 <sup>+</sup> granulocytes   | 92.15±4.18 | 79.46±6.01 | 74.47±11.46 | 77.2±14.56  | 86.07±7.06  |
| CD64 <sup>+</sup> granulocytes   | 28.94±5.31 | 50.23±7.13 | 38.79±12.66 | 57.62±15.5  | 56.4±10.22  |
| CD45RA <sup>+</sup> granulocytes | 23.42±2.81 | 20.86±5.78 | 20.43±11.94 | 21.42±9.01  | 20.89±9.52  |
| CD45RO <sup>+</sup> granulocytes | 64.58±4.67 | 49.01±7.58 | 41.63±12.26 | 50.14±18.96 | 55.57±11.41 |
| CD62L <sup>+</sup> granulocytes  | 99.23±0.45 | 80.34±7.92 | 97.36±1.08  | 32.94±17.52 | 97.19±0.94  |
| CD11a <sup>+</sup> granulocytes  | 97.65±0.53 | 32.04±8.7  | 7.58±2.354  | 78.7±17.75  | 23.19±9.38  |

---
