# Supplementary material for: Analysis of Novel Immunological Biomarkers Related to Rheumatoid Arthritis Disease Severity
Source: MDPI journal article supplement (doi:10.3390/ijms241512351), 2023-08-02
Supplement: s1 [file s1]

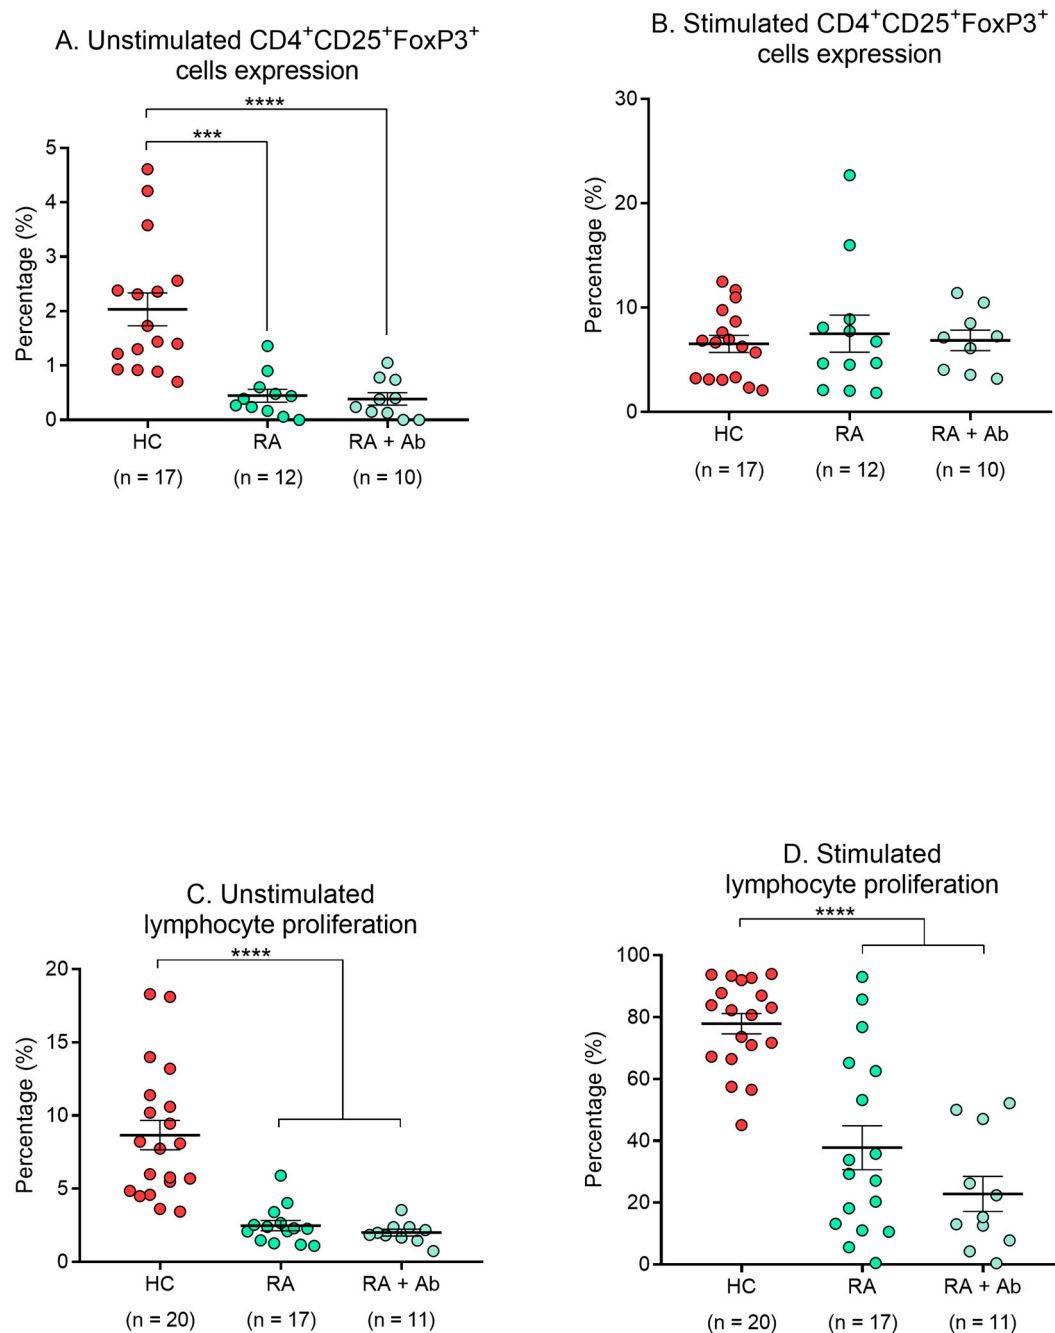

**Figure S1:** Analysis of T regulatory cell expression and lymphocyte proliferation. Percentage of unstimulated CD4<sup>+</sup>CD25<sup>+</sup>FoxP3<sup>+</sup> Treg cells (A) and stimulated CD4<sup>+</sup>CD25<sup>+</sup>FoxP3<sup>+</sup> Treg cells (B) in HCs, RA patients, and RA subjects given adalimumab ex vivo. Percentage of proliferating non-stimulated (C) and stimulated (D) lymphocytes was measured in HCs, RA patients, and RA subjects given adalimumab ex vivo. Bars show mean  $\pm$  SEM. *p*-values were calculated using ANOVA (Fisher's LSD test) and the Kruskal–Wallis test (uncorrected Dunn's test). \*\*\* = *p* < 0.001; \*\*\*\* = *p* < 0.0001.

## Expression of CD63<sup>+</sup>CD9<sup>+</sup> particles

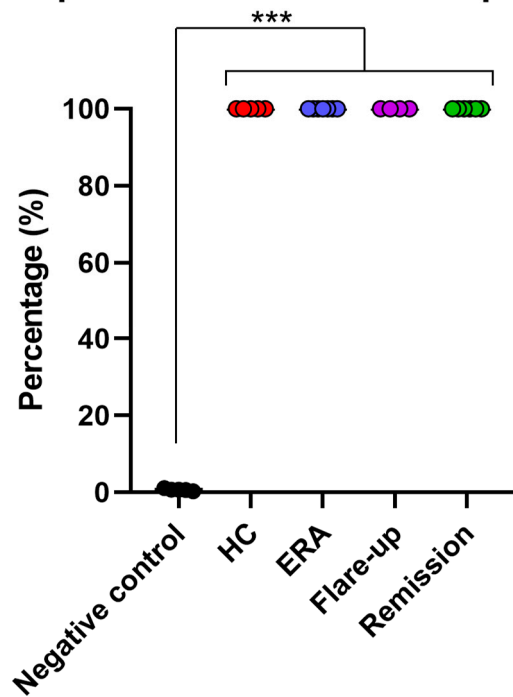

**Figure S2:** Analysis of CD63 and CD9 expression in exosomes. Percentage of CD63<sup>+</sup>CD9<sup>+</sup> expression in exosomes isolated from a negative control (PBS 1X), HCs, ERA, flare-up, and remission patients. *p*-values were calculated using the Kruskal–Wallis test (uncorrected Dunn’s test). \*\*\* = *p* < 0.001.
